# Supplementary material for: The utility of medico-legal databases for public health research: a systematic review of peer-reviewed publications using the National Coronial Information System
Source: PubMed Central journal article supplement (PMC4828834; doi:10.1186/s12961-016-0096-1), 2016-04-12
Supplement: 12961_2016_96_MOESM1_ESM.pdf [file 12961_2016_96_MOESM1_ESM.pdf]

## Additional files

### Additional file 1: Descriptive table of original research studies with NCIS as primary data source published in peer-reviewed journal

| Author, Year     | Journal                                                      | Country of Journal | Death Type            | Aim                                                                                                                                 | Study Design               | Study Period | Jurisdiction | Population | NCIS as Data Source | Main Findings                                                                                                  |
|------------------|--------------------------------------------------------------|--------------------|-----------------------|-------------------------------------------------------------------------------------------------------------------------------------|----------------------------|--------------|--------------|------------|---------------------|----------------------------------------------------------------------------------------------------------------|
| Woolfenden, 2003 | Journal of Paediatric and Child Health                       | Aus                | All deaths            | To examine characteristics and death of children presenting to emergency departments.                                               | Retrospective chart review | 2            | NSW          | Children   | 2                   | Presentation to emergency departments with aggression is an indicator of significant psychosocial dysfunction. |
| Driscoll, 2004   | International Journal of Injury Control and Safety Promotion | UK                 | Drowning              | To examine the contribution of alcohol to drowning deaths.                                                                          | Retrospective case series  | 2            | Multiple     | All        | Dual 1              | High blood alcohol levels are less common in drowning deaths than previously but still frequent.               |
| Freckelton, 2005 | Psychiatry, Psychology and Law                               | UK                 | Intentional self-harm | To review coroner's recommendations on suicides amongst individuals with psychiatric disorders.                                     | Retrospective case series  | 6            | National     | All        | 1                   | Coroners' recommendations should be more accessible and mandatory.                                             |
| Tooley, 2006     | Evolution and Human Behaviour                                | US                 | Injury-related death  | To investigate the association between living with a step parent and unintentional childhood fatal injury.                          | Retrospective case series  | 4            | Multiple     | Children   | 1                   | Step children are at significantly increased risk of unintentional fatal injury                                |
| Daking, 2007     | Health Information Management Journal                        | Aus                | All reportable        | To compare data coded to ICD-10 between ABS and NCIS.                                                                               | Retrospective case series  | 4            | National     | All        | Dual 1              | Discrepancies between the two sets of codes were detected in over 50% of cases.                                |
| Hanssens, 2007   | Aboriginal and Islander Health Worker Journal                | Aus                | Intentional self-harm | To identify contributing factors for clustering of suicide in NT.                                                                   | Retrospective case series  | 5            | NT           | Indigenous | Dual 1              | Evidence of "clustering" and "echo clusters" (communities do not recover before next cluster of suicide).      |
| Hanssens, 2007   | Aboriginal and Islander Health Worker Journal                | Aus                | Intentional self-harm | To investigate the contribution of a contagion effect, alcohol and familiarity with hanging as risk factors for Indigenous suicide. | Retrospective case series  | 7            | NT           | Indigenous | Dual 1              | Evidence of contagion, alcohol and hanging risk factors operating within clusters of suicide                   |
| MacBean, 2007    | Medical Journal of Australia                                 | Aus                | Bite-related deaths   | To describe the epidemiology of human and non-human bite                                                                            | Retrospective case series  | 7            | VIC          | All        | 2                   | Mammal bite injuries are common and often require                                                              |

| Author, Year              | Journal                                                               | Country of Journal | Death Type                             | Aim                                                                                              | Study Design              | Study Period | Jurisdiction | Population | NCIS as Data Source | Main Findings                                                                                                                                                |
|---------------------------|-----------------------------------------------------------------------|--------------------|----------------------------------------|--------------------------------------------------------------------------------------------------|---------------------------|--------------|--------------|------------|---------------------|--------------------------------------------------------------------------------------------------------------------------------------------------------------|
|                           |                                                                       |                    |                                        | injuries.                                                                                        |                           |              |              |            |                     | inpatient care.                                                                                                                                              |
| Driscoll, 2008            | Journal of Safety Research                                            | US                 | Work-related deaths                    | To assess the contribution of design to work-related deaths in Australia.                        | Retrospective case series | 3            | National     | All        | 1                   | Design is a significant contributor to work-related fatal injury.                                                                                            |
| Fragar, 2008.             | Journal of Occupational Health and Safety - Australia and New Zealand | Aus                | Unintentional deaths                   | To examine trends on non-intentional injury deaths in farms.                                     | Retrospective case series | 4            | National     | Farmers    | 1                   | Reduction in number and change in profile of farm unintentional deaths.                                                                                      |
| Hanssens, 2008            | Aboriginal and Islander Health Worker Journal                         | Aus                | Intentional deaths                     | To investigate the contribution of imitation and contagion in rise of Indigenous suicide rate.   | Retrospective case series | 8            | NT           | Indigenous | Dual 1              | Significant space-time-method clustering provides indirect evidence of imitative suicide and contagion.                                                      |
| Kaye, 2008                | Addiction                                                             | UK                 | Drug-related deaths                    | To investigate the pathology of methamphetamine related deaths.                                  | Retrospective case series | 6            | National     | All        | 1                   | Methamphetamine has contributed to a substantial number of deaths in Australia, particularly via its cardiotoxicity and use with other drugs.                |
| Watterson, 2008           | Australian Indigenous Law Review                                      | Aus                | Reportable deaths                      | To examine coronial recommendations in Indigenous deaths and their implementation.               | Retrospective case series | 3            | National     | Indigenous | 1                   | There were significant inconsistencies in the treatment of death in custody. Coronial recommendation can impact incidence of death but have been overlooked. |
| Young, 2008               | Conference proceedings                                                | Aus                | Transport-related deaths               | To investigate the types of information required to examine crashes.                             | Retrospective case series | 7            | National     | All        | 1                   | Low coroners' reports and key case indicators were the most important limitations.                                                                           |
| Bell, 2009                | Drug and Alcohol Dependence                                           | Switzerland        | Poisoning                              | To investigate overdose mortality (in-treatment and diversion) with methadone and buprenorphine. | Retrospective case series | 1            | NSW          | All        | 1                   | Buprenorphine is associated with lower overdose risk than methadone.                                                                                         |
| Brodie, 2009 <sup>1</sup> | Accident Analysis and Prevention                                      | UK                 | Transport-related unintentional deaths | To describe the nature and extent of heavy vehicle crashes.                                      | Retrospective case series | 6            | VIC          | All        | Dual 1              | Crashes involved a single vehicle leaving the roadway on a straight road, stimulants or cannabis, excess speed and absence of                                |

| Author, Year       | Journal                                             | Country of Journal | Death Type               | Aim                                                                                                        | Study Design              | Study Period | Jurisdiction | Population                 | NCIS as Data Source | Main Findings                                                                                                                                 |
|--------------------|-----------------------------------------------------|--------------------|--------------------------|------------------------------------------------------------------------------------------------------------|---------------------------|--------------|--------------|----------------------------|---------------------|-----------------------------------------------------------------------------------------------------------------------------------------------|
|                    |                                                     |                    |                          |                                                                                                            |                           |              |              |                            |                     | seatbelt                                                                                                                                      |
| Elnour, 2009       | Australian and New Zealand Journal of Public Health | Aus                | Intentional deaths       | To compare intentional deaths in ABS and NCIS datasets.                                                    | Retrospective case series | 6            | National     | All                        | 1                   | Underestimation of suicide mortality in Australia due to incomplete coroner data available to ABS coders.                                     |
| Grzebieta, 2009    | Journal of the Australasian College of Road Safety  | Aus                | Transport-related deaths | To examine motorcycle impacts into any roadside barrier.                                                   | Retrospective case series | 7            | National     | All                        | 1                   | The number of motorcycle impacts into roadside barrier was low, and predominantly involved W-beam steel barriers.                             |
| Hiller, 2010       | Emergency Medicine Journal                          | UK                 | Unintentional deaths     | To investigate the nature, management and outcomes of traumatic aortic transection.                        | Retrospective case series | 2            | VIC          | All                        | Dual 1              | Aortic transection was most commonly due to road crashes affecting young men, with a mortality rate of over 90%.                              |
| Kaye, 2009         | Drug and Alcohol Dependence                         | Switzerland        | Drug-related deaths      | To characterise MDMA-related deaths in Australia.                                                          | Retrospective case series | 6            | National     | All                        | 1                   | Methamphetamine has contributed to a substantial number of deaths in Australia, particularly via its cardiotoxicity and use with other drugs. |
| Morgan, 2009       | Journal of Science and Medicine in Sport            | Aus                | Drowning deaths          | To develop a direct observation measure of frequency and duration for surf beach bather exposure to water. | Prospective case series   | 2 months     | VIC          | All                        | Dual 1              | Overrepresentation of adult males in surf beach drowning statistics is partly due to greater exposure to deeper water                         |
| Pridmore, 2009     | Australian and New Zealand Journal of Psychiatry    | UK                 | Intentional deaths       | To characterize suicide in the NT.                                                                         | Retrospective case series | 7            | National     | Indigenous                 | Dual 1              | Suicide is more common in NT generally, and more common in NT Indigenous than NT non-Indigenous people.                                       |
| Samarasekera, 2009 | Journal of Paediatric and Child Health              | Aus                | Chest trauma deaths      | To characterise the nature and management of major paediatric chest trauma                                 | Population-based study    | 7            | VIC          | Children                   | 2                   | Serious injury requiring surgical intervention is rare.                                                                                       |
| Sikic, 2009        | Medical Journal of Australia                        | Aus                | Transport-related deaths | To investigate the incidence and nature of bicycling injuries                                              | Retrospective case series | 6            | VIC          | All                        | Dual 1              | Incidence has significantly increased in the last few years.                                                                                  |
| Sturgiss, 2009     | Journal of Forensic and Legal Medicine              | UK                 | Intentional deaths       | To characterise suicide in people over the age of 65 years.                                                | Retrospective case series | 7            | ACT          | People aged > 65 years old | 1                   | Suicide by hanging is not an uncommon mechanism in people over the age of 65 years.                                                           |

| Author, Year                | Journal                                             | Country of Journal | Death Type                           | Aim                                                                                                                                              | Study Design              | Study Period | Jurisdiction | Population   | NCIS as Data Source | Main Findings                                                                                                                     |
|-----------------------------|-----------------------------------------------------|--------------------|--------------------------------------|--------------------------------------------------------------------------------------------------------------------------------------------------|---------------------------|--------------|--------------|--------------|---------------------|-----------------------------------------------------------------------------------------------------------------------------------|
| Barron, 2010                | Police Practice and Research                        | UK                 | Intentional deaths                   | To characterise the personal, occupational, psychological, and social characteristics of police officers who commit suicide.                     | Retrospective case series | 9            | NSW          | Police force | 2                   | Risk factors are similar to general community.                                                                                    |
| Brodie, 2010 <sup>1</sup>   | Australian and New Zealand Journal of Public Health | Aus                | Transport-related deaths             | To describe the nature of coroners' recommendations on fatal heavy vehicle crashes                                                               | Retrospective case series | 7            | VIC          | All          | 1                   | Coroners' recommendations varied by vehicle type and number of fatalities.                                                        |
| Brodie, 2010 <sup>1</sup>   | Injury Prevention                                   | UK                 | Work and recreational-related deaths | To examine fatalities from tree felling.                                                                                                         | Retrospective case series | 8            | VIC          | All          | 1                   | 70% of fatal accidents involved persons not employed within a relevant industry.                                                  |
| Bugeja, 2010 <sup>1</sup>   | Health Information Management Journal               | Aus                | External causes of death             | To quantify the completeness of external cause ICD-10 codes in the NCIS compared with ABS.                                                       | Retrospective case series | 6            | VIC          | All          | 1                   | 4,397 (70.8%) matched exactly with the independently assigned ICD-10 code. Disparity primarily related to intent and specificity. |
| Cutajar, 2010               | Medical Journal of Australia                        | Aus                | Poisoning deaths                     | To determine the rate and risk of intentional and unintentional drug overdose in individuals sexually abused in childhood.                       | Cohort study              | 9            | VIC          | All          | Dual 1              | Child sexual abuse victims are at increased risk of suicide and accidental fatal drug overdose.                                   |
| Franklin, 2010.             | Medical Journal of Australia                        | Aus                | Drowning deaths                      | To examine trends in drowning deaths characteristics, and the feasibility of achieving a 50% reduction in unintentional drowning deaths by 2020. | Retrospective case series | 6            | National     | All          | 1                   | A 50% reduction in drowning fatalities may be achievable in certain types of immersions.                                          |
| McNeilly, 2010 <sup>1</sup> | Injury Prevention                                   | UK                 | Work-related death                   | To determine the presence of alcohol, cannabis and amphetamine-type stimulants in work-related injury deaths.                                    | Retrospective case series | 6            | VIC          | All          | 1                   | Alcohol and/or drugs were present in a significant portion of work-related deaths, which were mainly transport-related.           |
| Mikocka-Walus, 2010         | Emergency Medicine Australasia                      | Aus                | Transport-related death              | To compare the on- and off-road motorcycle-related major trauma.                                                                                 | Retrospective case series | 8            | VIC          | All          | Dual 1              | Off-road motorcycle-related major trauma has increased, whilst on-road motorcycle-related death has decreased.                    |

| Author, Year   | Journal                          | Country of Journal | Death Type              | Aim                                                                                                                                                              | Study Design                         | Study Period | Jurisdiction | Population   | NCIS as Data Source | Main Findings                                                                                                                             |
|----------------|----------------------------------|--------------------|-------------------------|------------------------------------------------------------------------------------------------------------------------------------------------------------------|--------------------------------------|--------------|--------------|--------------|---------------------|-------------------------------------------------------------------------------------------------------------------------------------------|
| Mitra, 2010    | Emergency Medicine Australasia   | Aus                | Transport-related death | To determine the incidence and pattern of injuries in tram-related injuries.                                                                                     | Retrospective case series            | 8            | VIC          | All          | Dual 1              | Although most cases involved minor injuries, there was a significant increase in the incidence of major trauma cases, mostly pedestrians. |
| Pilgrim, 2010  | Forensic Science International   | Ireland            | Poisoning deaths        | To determine the involvement of selected serotonin-active drugs in sudden death.                                                                                 | Retrospective case series            | 7            | VIC          | All          | 1                   |                                                                                                                                           |
| Rintoul, 2010  | Injury Prevention                | UK                 | Poisoning deaths        | To describe the trends and demographic characteristics in fatal drug toxicity involving oxycodone.                                                               | Population-based observational study | 10           | VIC          | All          | 1                   |                                                                                                                                           |
| Robinson, 2010 | Psychiatric Research             | UK                 | All reportable          | To determine the rate of sudden death and socio-demographic characteristics among young people with first episode psychosis following commencement of treatment. | Cohort study                         | 9            | National     | Young people | Dual 1              | Of nineteen deaths, most were suicide. Risk factors were male gender, previous attempt and greater symptom severity.                      |
| Studdert, 2010 | Medical Journal of Australia     | Aus                | All reportable          | To evaluate the changes in the understanding of the manner and cause of death occurring during the course of coronial investigations.                            | Ecological analysis                  | 9            | National     | All          | 1                   | Coronial investigations transform basic understanding of cause of death in only a small minority of cases.                                |
| Andrews, 2011  | BMC Research Notes               | UK                 | All reportable          | To determine the proportion of reportable deaths among ex-prisoners.                                                                                             | Retrospective case series            | 7            | National     | Ex-prisoners | 1                   | Only a small minority of reportable deaths among ex-prisoners was detected.                                                               |
| Austin, 2011   | Journal of Forensic Sciences     | US                 | Intentional self-harm   | To investigate the cases of suicide involving helium inhalation.                                                                                                 | Retrospective case series            | 9            | National     | All          | 1                   | There was a recent and striking increase in cases of suicide involving helium inhalation.                                                 |
| Beacroft, 2011 | Australian Indigenous Law Review | Aus                | Deaths in custody       | To examine trends and issues in deaths in custody.                                                                                                               | Retrospective case series            | 9            | National     | Indigenous   | Dual 1              | A greater proportion of deaths in police custody involves Indigenous than non-Indigenous Australians.                                     |

| Author, Year              | Journal                                | Country of Journal | Death Type               | Aim                                                                                                                       | Study Design              | Study Period | Jurisdiction | Population          | NCIS as Data Source | Main Findings                                                                                                                                                                                                                                                                                   |
|---------------------------|----------------------------------------|--------------------|--------------------------|---------------------------------------------------------------------------------------------------------------------------|---------------------------|--------------|--------------|---------------------|---------------------|-------------------------------------------------------------------------------------------------------------------------------------------------------------------------------------------------------------------------------------------------------------------------------------------------|
| Bugeja, 2012 <sup>1</sup> | Injury Prevention                      | UK                 | All reportable           | To quantify and examine coroners' recommendations according to principles of injury prevention.                           | Cohort study              | 6            | VIC          | All                 | 1                   | Coroners' recommendations were relatively rare, and did not systematically draw on injury prevention research.                                                                                                                                                                                  |
| Dearn, 2011               | Journal of Law and Medicine            | Aus                | All reportable           | To examine the factors contributing to the "preventable deaths" of people under 50 years of age in residential aged care. | Case study                | 6            | VIC          | Aged Care residents | Dual 1              | Of the three cases of "preventable" deaths, none was reported, and all have implications for systemic reform.                                                                                                                                                                                   |
| Franklin, 2011            | Journal of Paediatric and Child Health | Aus                | Drowning deaths          | To characterise the immersion rescuer-victim dyad where the primary 'victim' is a child and the 'rescuer' drowns.         | Retrospective case series | 6            | National     | Children            | 1                   | The dyad involves a male, parent, partner or relative; an unfamiliar water hazard; a tourist; the primary victim usually survives.                                                                                                                                                              |
| Frechede, 2011            | Accident Analysis and Prevention       | UK                 | Transport-related deaths | To compare the relative contribution, cause of death and risk factors of all single vehicle crash types between 3 States. | Retrospective case series | 8            | Multiple     | All                 | 1                   | Rollovers accounted for a third of all occupant fatalities, with differences in mechanisms, crash type and containment of the occupant between states.                                                                                                                                          |
| Jama, 2011                | Accident Analysis and Prevention       | UK                 | Transport-related deaths | To describe and compare motorcycle-into-barrier crashes in Australia and New Zealand.                                     | Retrospective case series | 6            | National     | All                 | 1                   | Fatalities usually involved a single vehicles, young men, steel W-beams, speeding and high blood alcohol levels. A majority occurred on a weekend, during daylight hours, on clear days with dry road surfaces.                                                                                 |
| Jones, 2011 <sup>1</sup>  | Injury Prevention                      | UK                 | Work-related deaths      | To describe the nature and mechanisms of work-related non-crash heavy vehicle driver fatalities.                          | Retrospective case series | 10           | National     | All                 | Dual 1              | Forty-seven cases of a truck driver being killed while performing a non-driving task were identified from the NCIS. A common sequence of events was identified in 21 (45%) cases involved parking on an incline combined with brakes not functioning appropriately leading to a crushing death. |

| Author, Year   | Journal                                 | Country of Journal | Death Type               | Aim                                                                                                                         | Study Design              | Study Period | Jurisdiction | Population | NCIS as Data Source | Main Findings                                                                                                                  |
|----------------|-----------------------------------------|--------------------|--------------------------|-----------------------------------------------------------------------------------------------------------------------------|---------------------------|--------------|--------------|------------|---------------------|--------------------------------------------------------------------------------------------------------------------------------|
| Petrass, 2011  | Medical Journal of Australia.           | Aus                | Drowning deaths          | To determine the frequency of lack of supervision in child drowning.                                                        | Retrospective case series | 10           | National     | Children   | 1                   | Lack of supervision was identified as a contributing factor in most cases.                                                     |
| Pilgrim, 2011  | International Journal of Legal Medicine | Germany            | Poisoning deaths         | To examine the incidence of inappropriate prescribing patterns involving serotonergic drugs.                                | Retrospective case series | 7            | VIC          | All        | 1                   | Cases comprised contraindicated drug combinations, mostly a combination of three to five drugs.                                |
| Pilgrim, 2011  | Journal of Analytical Toxicology        | US                 | Poisoning deaths         | To determine the incidence of ecstasy use in drug interaction related sudden death.                                         | Retrospective case series | 7            | VIC          | All        | 1                   | Half of cases involved the concomitant use of MDMA with other drugs that were likely to result in an adverse drug reaction.    |
| Roxburgh, 2011 | Medical Journal of Australia            | Aus                | Poisoning deaths         | To document trends in morphine and oxycodone prescription, hospital separations for overdose, adverse events and mortality. | Cross-sectional study     | 9            | National     | All        | Dual 1              | Oxycodone prescriptions have increased, particularly among older Australians.                                                  |
| Andrew, 2012   | Injury                                  | UK                 | Recreational deaths      | To examine trends in sport and recreation activities-related deaths.                                                        | Retrospective case series | 7            | VIC          | All        | 1                   | There was an increase in the rate of major trauma or death from sport and active recreation injuries.                          |
| Andrews, 2012  | BMC Public Health                       | UK                 | Poisoning deaths         | To explore the causes and circumstances of drug-related mortality among ex-prisoners.                                       | Retrospective case series | 8            | National     |            | 1                   | Drug-related deaths are common among ex-prisoners and often occur in a home, with use of multiple substances.                  |
| Bambach, 2012  | Accident Analysis and Prevention        | UK                 | Transport-related deaths | To analyse injury profiles in motorcycle-barrier crashes.                                                                   | Retrospective case series | 6            | National     | All        | 1                   | The thorax region had the highest incidence of injury followed by the head.                                                    |
| Byard, 2012    | Journal of Forensic Sciences            | US                 | Recreational deaths      | To characterise autoerotic death or sexual asphyxia.                                                                        | Retrospective case series | 7            | National     | All        | Dual 1              | Lethal sexual asphyxia is uncommon in Australia and Sweden, with a young male predominance.                                    |
| Cheung, 2012   | Social Science & Medicine               | UK                 | Intentional self-harm    | To identify sex-specific suicide pattern and metropolitan-rural-remote differentials.                                       | Retrospective case series | 5            | National     | All        | 1                   | There were rates of suicide in rural and remote areas for males, with some high risk postal areas. Socio-economic deprivation, |

| Author, Year            | Journal                                                      | Country of Journal | Death Type                      | Aim                                                                                                     | Study Design              | Study Period | Jurisdiction | Population         | NCIS as Data Source | Main Findings                                                                                                                                                               |
|-------------------------|--------------------------------------------------------------|--------------------|---------------------------------|---------------------------------------------------------------------------------------------------------|---------------------------|--------------|--------------|--------------------|---------------------|-----------------------------------------------------------------------------------------------------------------------------------------------------------------------------|
|                         |                                                              |                    |                                 |                                                                                                         |                           |              |              |                    |                     | Indigenous status and low access to mental health service were risk factors.                                                                                                |
| Curran, 2012            | Emergency Medicine Australasia                               | Aus                | Deaths in emergency departments | To determine recurrent themes among coroners' recommendations aiming at increase the safety of ED care. | Retrospective case series | 2            | Multiple     | All                | 1                   | Recommendation themes related to issues of risk management/medico-legal, diagnostic/therapeutic error, education, documentation/communication and re-presentation.          |
| Deasy, 2012             | Resuscitation                                                | Ireland            | Injury-related deaths           | To describe the profile of paediatric traumatic out of hospital cardiac arrest.                         | Retrospective case series | 10           | VIC          | Children           | Dual 1              | Paediatric traumatic out of hospital cardiac arrest is uncommon. Resuscitation efforts are seldom effective and associated with poor neurological outcome.                  |
| Freestone, 2012         | Health Information Management Journal                        | Aus                | All reportable                  | To examine use and quality of geographic location data in the NCIS.                                     | Retrospective case series | 6            | National     | All                | 1                   | NCIS data can be used at high levels of granularity. Data cleaning can be used to improve data quality.                                                                     |
| Guiney, 2012            | Australian Journal of Rural Health                           | Aus                | Intentional self-harm           | To determine whether farming suicides increased in Victoria during the prolonged drought.               | Retrospective case series | 7            | VIC          | Farmers            | 1                   | Due to the small number of relevant cases, there was no concluding evidence of a pattern of increasing farming suicides during the drought years.                           |
| Jones 2012 <sup>1</sup> | International Journal of Injury Control and Safety Promotion | UK                 | Work-related deaths             | To describe the circumstances of work-related fatalities in workers aged 55 years and older.            | Retrospective case series | 10           | National     | 55 years and older | 1                   | Most fatalities were male, working in agriculture, forestry and fishing, and were transport-related.                                                                        |
| Judd 2012               | Social Psychiatry and Psychiatric Epidemiology               | Germany            | Intentional self-harm           | To examine the role of psychosocial factors, physical and mental health, gender in suicide.             | Retrospective case series | 5            | National     | All                | 1                   | Psychosocial factors were important, psychiatric morbidity was less than generally reported, and comparable proportions of males and females used violent means to suicide. |



| Author, Year  | Journal                                                      | Country of Journal   | Death Type                         | Aim                                                                                                                        | Study Design              | Study Period | Jurisdiction | Population | NCIS as Data Source | Main Findings                                                                                                                                                                                                     |
|---------------|--------------------------------------------------------------|----------------------|------------------------------------|----------------------------------------------------------------------------------------------------------------------------|---------------------------|--------------|--------------|------------|---------------------|-------------------------------------------------------------------------------------------------------------------------------------------------------------------------------------------------------------------|
| Lippman 2012  | Medical Journal of Australia                                 | Aus                  | Recreational deaths                | To examine the frequency and causes of snorkelling-related deaths.                                                         | Retrospective case series | 7            | National     | All        | 1                   | Snorkelling-related deaths are rare. Risk factors include cardiac or respiratory disease, family history of sudden unexpected death, unfamiliarity with equipment and hyperventilation before breath-hold diving. |
| Lower 2012    | NSW Public Health Bulletin                                   | Aus                  | Injury-related deaths              | To describe the pattern of non-intentional farm-related fatalities.                                                        | Retrospective case series | 4            | National     | Farmers    | 1                   | The incidence of farm fatalities has declined. Most are transport-related, half are nonwork-related.                                                                                                              |
| Machlin 2012  | Crisis                                                       | Germany              | Intentional self-harm              | To determine the factors associated with an individual suicide featuring in the media.                                     | Retrospective case series | 1            | National     | All        | Dual 1              | Reported suicides tend to be those that may either heighten the risk of lethal imitative behaviors or serve to distort public perceptions about suicide.                                                          |
| Pilgrim 2012  | Forensic Science International                               | Ireland              | Poisoning deaths                   | To examine four fatal cases of MDMA-moclobemide induced serotonin toxicity.                                                | Retrospective case series | 7            | VIC          | All        | 1                   | Symptoms included hyperthermia, hyperkalemia, profuse sweating, twitching and shaking. Two cases involved concentrations associated with toxicity, and three some form of heart disease.                          |
| Pilgrim 2012  | Current Drug Metabolism                                      | United Arab Emirates | Poisoning deaths                   | To genotype the six main CYP450 enzymes in fatalities where target drugs susceptible to metabolic variation were detected. | Retrospective case series | 4            | VIC          | All        | 1                   | Variation in genotype for rate of metabolism varied for different enzymes.                                                                                                                                        |
| Routley 2012  | International Journal of Injury Control and Safety Promotion | UK                   | Work-related intentional self-harm | To examine work related suicides recorded on the Victorian Work Related Fatality Database (VWRFD).                         | Retrospective case series | 8            | VIC          | All        | 2                   | Half of cases had an association with work stressors including business difficulties, work injury, unemployment/redundancy or conflict with supervisors/colleagues.                                               |
| Sveticic 2012 | BMJ Open                                                     | UK                   | Intentional self-harm              | To compare the characteristics of persons who die by suicide                                                               | Retrospective case series | 8            | QSL          | All        | Dual 1              | Suicides by missing persons show several distinct characteristics in                                                                                                                                              |

| Author, Year               | Journal                                                      | Country of Journal | Death Type               | Aim                                                                                                                | Study Design              | Study Period | Jurisdiction | Population  | NCIS as Data Source | Main Findings                                                                                                                                                                     |
|----------------------------|--------------------------------------------------------------|--------------------|--------------------------|--------------------------------------------------------------------------------------------------------------------|---------------------------|--------------|--------------|-------------|---------------------|-----------------------------------------------------------------------------------------------------------------------------------------------------------------------------------|
|                            |                                                              |                    |                          | after being reported as missing compared with other suicides.                                                      |                           |              |              |             |                     | comparisons to other suicides in terms of method, location, physical health and communicating their intent.                                                                       |
| Walter 2012 <sup>1</sup>   | Health and Place                                             | US                 | All reportable deaths    | To examine the relationship between remoteness of locations of deaths and coroners' decisions to hold inquests.    | Retrospective case series | 8            | Multiple     | All         | 1                   | The remoteness of a death's location strongly and positively predicted the chance that an inquest will be held.                                                                   |
| Walter 2012 <sup>1</sup>   | Canadian Medical Association Journal                         | Canada             | All reportable           | To compare the characteristics of discretionary inquests and cases resolved through administrative investigations. | Retrospective case series | 8            | Multiple     | All         | 1                   | Deaths that coroners choose to take to inquest differ systematically from those they do not in terms of age of the decedent and cause of death.                                   |
| Cheung 2013                | PLoS One                                                     | US                 | Intentional self-harm    | To develop techniques in using scan statistics to detect clusters of suicide.                                      | Retrospective case series | 5            | National     | All         | 1                   | There were discrepancies between national and state/territory cluster detection by scan statistics due to the contrast of the underlying suicide rates across states/territories. |
| Kitching 2014 <sup>1</sup> | International Journal of Injury Control and Safety Promotion | UK                 | Work-related deaths      | To describe pedestrian fatalities in workplaces in relation to vehicles, mobile plant and their loads.             | Retrospective case series | 11           | National     | Pedestrians | Dual 1              | Most deaths occurred in Agriculture and Construction, involving farmers, labourers and machinery operators.                                                                       |
| Lower 2013                 | Australian and New Zealand Journal of Public Health          | Aus                | Quad bike-related deaths | To determine the economic costs of quad bike-related fatalities.                                                   | Retrospective case series | 10           | National     | All         | Dual 1              | The estimated total economic cost associated with quad bike fatalities was \$288.1 million, with an average cost for each fatality of \$2.3 million.                              |
| Pilgrim 2013               | Forensic Science, Medicine and Pathology                     | US                 | Poisoning deaths         | To describe the circumstances and associated co-morbidities of quetiapine-related deaths.                          | Cohort study              | 9            | VIC          | All         | 1                   | Misuse of quetiapine was not a significant issue, and only occasionally led to fatalities when used in excess or concomitantly with interacting drugs                             |
| Pilgrim 2013               | Forensic Science                                             | Ireland            | Poisoning                | To determine the presence and                                                                                      | Cohort study              | 12           | VIC          | All         | 1                   | Cocaine was detected relatively                                                                                                                                                   |

| Author, Year             | Journal                                     | Country of Journal | Death Type               | Aim                                                                                                                                               | Study Design              | Study Period | Jurisdiction | Population              | NCIS as Data Source | Main Findings                                                                                                                                                                                                 |
|--------------------------|---------------------------------------------|--------------------|--------------------------|---------------------------------------------------------------------------------------------------------------------------------------------------|---------------------------|--------------|--------------|-------------------------|---------------------|---------------------------------------------------------------------------------------------------------------------------------------------------------------------------------------------------------------|
|                          | International                               |                    | deaths                   | involvement of cocaine in sudden and unexpected death.                                                                                            |                           |              |              |                         |                     | infrequently. However it appeared to be associated with a significant degree of cardiotoxicity, independent of cocaine concentration.                                                                         |
| Pridmore 2013            | Asian Journal of Psychiatry                 | Netherlands        | Intentional self-harm    | To apply the OPS framework to coroners' reports to compare suicides in Indigenous and non-Indigenous communities.                                 | Retrospective case series | 11           | NT           | Indigenous              | 1                   | The non-Indigenous group was over represented in the mental illness category and the Indigenous group was over represented in the social/environmental category.                                              |
| Roxburgh, 2013           | Drug Alcohol Review                         | UK                 | Poisoning deaths         | To describe trends in fentanyl prescribing and mortality rates of fentanyl-related deaths.                                                        | Retrospective case series | 13           | National     | All                     | Dual 1              | A significant increase in fentanyl prescribing in Australia was observed as was an increase in fentanyl deaths.                                                                                               |
| Anthikkat 2013           | Journal of Paediatrics and Child Health     | Aus                | Transport-related deaths | To investigate environmental and socio-demographic risk factors associated with low-speed vehicle run over fatalities in children aged 0–5 years. | Retrospective case series | 11           | National     | Children                | 1                   | The incidence was low and declined over the study period. Most incidents occurred in non-traffic settings, with vehicles most likely to be reversing, and more commonly in lower socio-economic status areas. |
| Bambach 2013             | Journal of Transportation Safety & Security | UK                 | Transport-related deaths | To examine the crash mechanics of fatal motorcycle–barrier crashes.                                                                               | Retrospective case series | 6            | National     | All                     | Dual 1              | Certain motorcycle types, crash postures, pre-crash speeds, impact trajectory angles can be used to inform motorcycle-barrier crash test protocols.                                                           |
| Brighton 2013            | Natural Hazards and Earth System Sciences   | Germany            | Drowning deaths          | To describe the number and demographics of rip current related drowning deaths and rescues.                                                       | Retrospective case series | 8            | National     | All                     | Dual 1              | Rip currents were related to 44% of all beach-related drowning deaths and 57.4% of reported major rescues which is much lower than traditionally cited.                                                       |
| Ehsani 2013 <sup>1</sup> | Safety Science                              | Netherlands        | Work-related deaths      | To describe fatal incidents involving young workers aged 15–24-years.                                                                             | Retrospective case series | 8            | National     | People aged 15-24 years | 1                   | The Agriculture, Forestry and Fishing sector had the highest fatality rate for young workers,                                                                                                                 |

| Author, Year   | Journal                                                | Country of Journal | Death Type               | Aim                                                                                                                   | Study Design              | Study Period | Jurisdiction | Population | NCIS as Data Source | Main Findings                                                                                                                                                                                            |
|----------------|--------------------------------------------------------|--------------------|--------------------------|-----------------------------------------------------------------------------------------------------------------------|---------------------------|--------------|--------------|------------|---------------------|----------------------------------------------------------------------------------------------------------------------------------------------------------------------------------------------------------|
|                |                                                        |                    |                          |                                                                                                                       |                           |              |              |            |                     | and fatality rates were higher than the overall rate.                                                                                                                                                    |
| Goeman 2013    | BMJ Open                                               | UK                 | Asthma-related deaths    | To characterise the current circumstances surrounding the asthma deaths and to identify potential interventions.      | Retrospective case series | 5            | National     | All        | 1                   | Risk factors included physical barriers, psychosocial issues, smoking, drug and alcohol dependence, allergies, respiratory tract infections, inadequate treatment and delay in seeking help.             |
| Grzebieta 2013 | International Journal of Crashworthiness               | UK                 | Recreational deaths      | To examine the pattern of hospitalised morbidity and death associated with go-kart-related-injuries.                  | Retrospective case series | 8            | National     | All        | 1                   | In-depth analysis of go-kart fatal incident can be used to design crashworthy vehicle and barrier systems.                                                                                               |
| Grzebieta 2013 | Journal of the Transportation                          | US                 | Transport-related deaths | To investigate the crash mechanics and injury profiles of 78 fatal motorcycle-barrier crashes.                        | Retrospective case series | 6            | National     | All        | 1                   | Half the motorcyclists were in the upright posture, the mean precrash speed was 100.8 km/h, and thorax area had the highest incidence of injury.                                                         |
| Lingard 2013   | Engineering, Construction and Architectural Management | UK                 | Work-related deaths      | To investigate the causes of fatal incidents involving excavators in the Australian construction industry.            | Retrospective case series | Unknown      | National     | All        | 1                   | Causes included the use of unsafe work methods and suitability of plant. Communication and design of work processes, were likely contributors.                                                           |
| Lingard 2013   | Engineering, Construction and Architectural Management | UK                 | Work-related deaths      | To investigate the circumstances surrounding fatal incidents involving plant in the Australian construction industry. | Retrospective case series | Unknown      | National     | All        | 1                   | Most incidents involved excavators, trucks and cranes, and people being run over or struck by a moving object. Site layout and unsafe actions were the most commonly identified immediate circumstances. |
| Lippmann       | Diving and Hyperbaric Medicine                         | Aus                | Recreational deaths      | To investigate diving-related fatalities recorded on the DAN Asia-Pacific (DAN AP) database.                          | Retrospective case series | 1            | National     | All        | 1                   | Twelve deaths occurred while snorkelling, eight while scuba diving. Apnoeic hypoxia, cardiac-related issues were implicated.                                                                             |
| Porter 2013    | Australian & New                                       | Aus                | Deaths in                | To analyse Indigenous deaths                                                                                          | Retrospective             | 9            | National     | Indigenous | Dual 1              | Key contributing factors included                                                                                                                                                                        |

| Author, Year     | Journal                                                 | Country of Journal | Death Type               | Aim                                                                                                                                                      | Study Design              | Study Period | Jurisdiction | Population | NCIS as Data Source | Main Findings                                                                                                                                                                                        |
|------------------|---------------------------------------------------------|--------------------|--------------------------|----------------------------------------------------------------------------------------------------------------------------------------------------------|---------------------------|--------------|--------------|------------|---------------------|------------------------------------------------------------------------------------------------------------------------------------------------------------------------------------------------------|
|                  | Zealand Journal of Criminology                          |                    | custody                  | in police custody since the 1991 Royal Commission.                                                                                                       | case series               |              |              |            |                     | alcohol, criminal behaviour and mental health.                                                                                                                                                       |
| Arnautovska 2014 | Social Psychiatry and Psychiatric Epidemiology          | Germany            | Intentional self-harm    | To describe farmer suicide in Queensland.                                                                                                                | Retrospective case series | 10           | QSL          | Farmers    | Dual 1              | No significant associations were found between rates of farmer and non-farmer suicide, or between the proportion of farmers in a region and farmer suicide rates.                                    |
| Bambach 2014     | Traffic Injury Prevention                               | US                 | Transport-related deaths | To describe the nature and causes of head and spine injuries sustained by motorcyclists in head-leading collisions with fixed objects.                   | Retrospective case series | 13           | National     | All        | Dual 1              | There was a predominance of basilar skull fractures, and upper cervical spine injuries, indicating a typical impact orientation of sliding in the prone position with head extension.                |
| Cantwell 2014    | Injury-International Journal of the Care of the Injured | UK                 | Pneumothorax             | To identify temporal trends in the number of needle decompressions and untreated patients, and any unintended adverse consequences from the revised CPG. | Retrospective case series | 4            | VIC          | All        | Dual 1              | There was a decrease in untreated tension pneumothoraces, but an increase in the number of patients that needed further treatment on arrival.                                                        |
| Dodds 2014       | Health Information Management Journal                   | Aus                | Intentional self-harm    | To explore the process and problems of coding of the NCIS database 'intent' fields, and assess the use an option-based checklist.                        | Retrospective case series | 1            | Multiple     | All        | 1                   | Coroners and coders do not follow a standard proforma. Coders rely mainly on police report at case notification and coroners' findings at case completion.                                           |
| Gabbe 2014       | Annals of Surgery                                       | US                 | Transport-related deaths | To describe the burden of road transport-related serious injury after the introduction of a regionalized, inclusive trauma system.                       | Retrospective case series | 11           | VIC          | All        | Dual 1              | Incidence of transport-related deaths decreased whereas the incidence of hospitalized major trauma increased. Years of life lost decreased by 43%, and years lived with disability increased by 32%. |
| Gibb 2014        | Construction Management and                             | UK                 | Work-related activities  | To apply a holistic framework to explain the way that causal                                                                                             | Comparative studies       | 11           | National     | All        | Dual 1              | The results suggest that the Construction Accident Causality                                                                                                                                         |

| Author, Year | Journal                                        | Country of Journal | Death Type                            | Aim                                                                                                                                                                                         | Study Design              | Study Period | Jurisdiction | Population | NCIS as Data Source | Main Findings                                                                                                                                                                                                                                      |
|--------------|------------------------------------------------|--------------------|---------------------------------------|---------------------------------------------------------------------------------------------------------------------------------------------------------------------------------------------|---------------------------|--------------|--------------|------------|---------------------|----------------------------------------------------------------------------------------------------------------------------------------------------------------------------------------------------------------------------------------------------|
|              | Economics                                      |                    |                                       | pathways to accidents occur.                                                                                                                                                                |                           |              |              |            |                     | framework is helpful for the analysis of the causes of accidents with outcomes of differing severity.                                                                                                                                              |
| Law 2014     | Social Psychiatry and Psychiatric Epidemiology | Germany            | Intentional self-harm                 | To examine the socioeconomic and demographic characteristics of second-generation migrants who died by suicide.                                                                             | Retrospective case series | 8            | Multiple     | Migrants   | Dual 1              | Suicide in second-generation migrants tended to be represented by younger subjects, more often never married. Males aged 25-39 years tended to have a higher suicide risk than first-generation.                                                   |
| Lockley 2014 | Suicide and Life-Threatening Behaviour         | US                 | Intentional self-harm                 | To present the Masterplan project as a case study of a comprehensive response to suicide at a site known to be a hotspot for jumping suicides.                                              | Retrospective case series | 11           | NSW          | All        | Dual 1              | There were reductions in reported jumps and confirmed suicides, although the trends are not statistically significant, and a significant increase in police call-outs to intervene with suicidal people who have not yet reached the cliff's edge. |
| Milner 2014  | International Journal of Epidemiology          | UK                 | Intentional self-harm                 | To assess the association between labour force status and suicide with a particular focus on the unemployed, the economically inactive who theoretically are able to work and the employed. | Retrospective case series | 10           | National     | All        | 1                   | Economically inactive/unemployed people had a greater suicide rate ratio than employed males people. There was an increase in suicide among both employed and economically inactive/unemployed people.                                             |
| Milner 2014  | Australian & New Zealand Journal of Psychiatry | Aus                | Intentional self-harm                 | The present study focuses on the potential risks associated with the effects of involuntary job loss, as distinct from investigating the category of unemployment.                          | Retrospective case series | 6            | NSW          | All        | 1                   | Involuntary job loss, low socioeconomic status, mental disorder were associated with a greater odds ratio for suicide and attempted suicide.                                                                                                       |
| Nott 2014    | Australasian Journal on Ageing                 | Aus                | Traumatic brain injury-related deaths | To examine the association between increasing age and mortality in TBI.                                                                                                                     | Retrospective case series | 8            | NSW          | All        | Dual 1              | After controlling for known mortality risk factors, older patients were three times more                                                                                                                                                           |

| Author, Year    | Journal                        | Country of Journal | Death Type               | Aim                                                                                                                                                                         | Study Design              | Study Period | Jurisdiction | Population | NCIS as Data Source | Main Findings                                                                                                                                                                                                      |
|-----------------|--------------------------------|--------------------|--------------------------|-----------------------------------------------------------------------------------------------------------------------------------------------------------------------------|---------------------------|--------------|--------------|------------|---------------------|--------------------------------------------------------------------------------------------------------------------------------------------------------------------------------------------------------------------|
|                 |                                |                    |                          |                                                                                                                                                                             |                           |              |              |            |                     | likely to die than younger patients. Crude mortality rates increased exponentially with advancing age.                                                                                                             |
| Page 2014       | BMC Psychiatry                 | UK                 | Intentional self-harm    | To investigate the association between psychiatric disorders, socio-economic measures and suicide.                                                                          | Retrospective case series | 6            | NSW          | All        | 1                   | Strong associations were evident between mental disorders and suicide, especially for anxiety disorders. Associations for socio-economic status were smaller than for mental disorders.                            |
| Pilgrim 2014    | Drug and Alcohol Dependence    | Switzerland        | Assault                  | To ascertain the prevalence of deaths in Australia involving "king hits" and determine the involvement of drugs and other sociological factors in these violent fatalities. | Retrospective case series | 13           | National     | All        | 1                   | 90 cases were identified with a median age of 33 years, 53 cases involved the use of alcohol or other drugs.                                                                                                       |
| Pilgrim 2014    | Forensic Science International | Ireland            | Poisoning deaths         | To determine the prevalence, blood concentrations and contribution of duloxetine.                                                                                           | Retrospective case series | 4            | VIC          | All        | 1                   | Death involving duloxetine alone was uncommon; however with certain comorbidities and co-administered drugs, the risk of a fatal event is increased, particularly in the setting of other pro-serotonergic agents. |
| Clapperton 2013 | Medical Journal of Australia   | Aus                | Quad bike-related deaths | To examine fatal and hospital-treated injury associated with quad bike admissions and ED presentations in Victoria.                                                         | Retrospective case series | 10           | VIC          | All        | Dual 1              | The peak age group for fatalities and admissions was 15-29 years. Males were strongly overrepresented. Intracranial injury, fractures and traumatic asphyxiation were the most common injuries among fatal cases.  |

<sup>1</sup> Publications involving authors of the present study.

Legend

Country of journal: Aus = Australia; UK = United Kingdom; US = United States.

Jurisdiction: VIC = Victoria; WA = Western Australia; NT = Northern Territory; QSL = Queensland; NSW = New South Wales.

NCIS as Data Source: 1 = primary; 2 = secondary.
